# Supplementary material
Source: PubMed Central journal article supplement (PMC3243826)
Supplement: NIHMS333778-supplement-Suppl_Data.pdf [file NIHMS333778-supplement-Suppl_Data.pdf]

Supplementary Figure 1. Wang, J. et al.

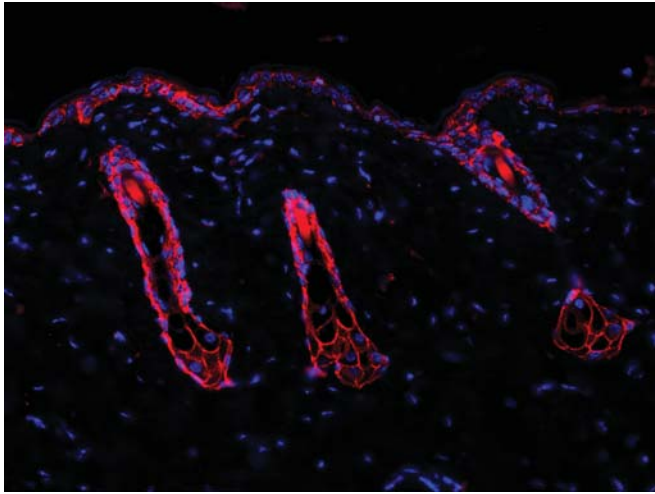

*Trop2*<sup>+/+</sup>

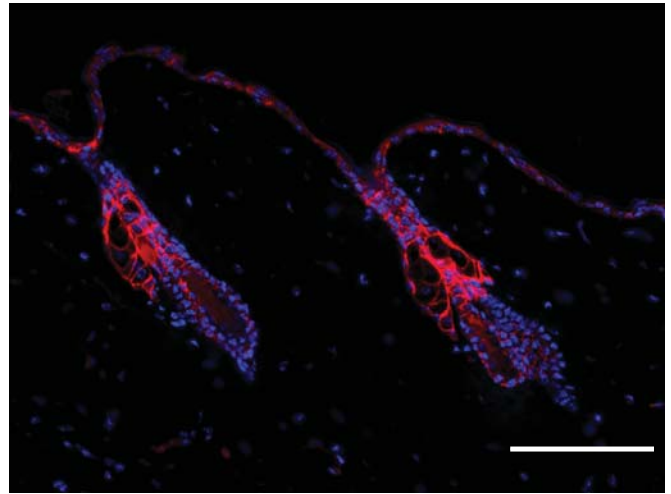

*Trop2*<sup>-/-</sup>

Supplementary Figure 2. Wang, J. et al.

A

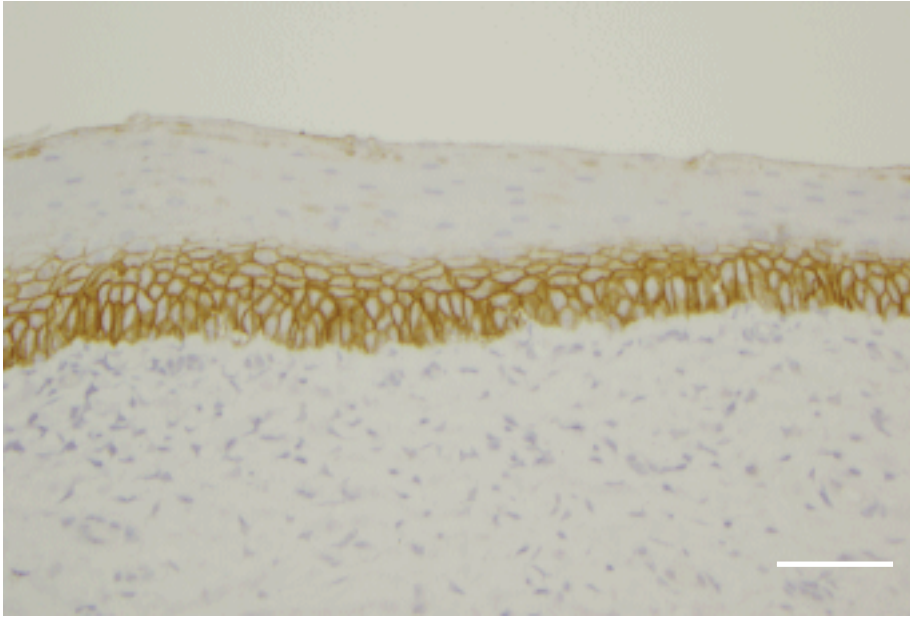

B

Trop2<sup>+/+</sup>

Trop2<sup>-/-</sup>

Loricrin

Trop2

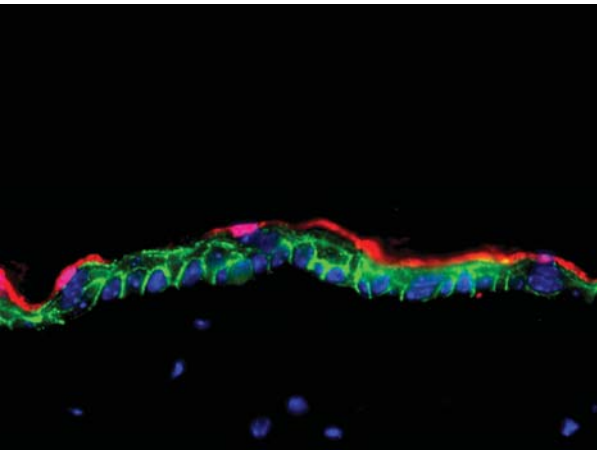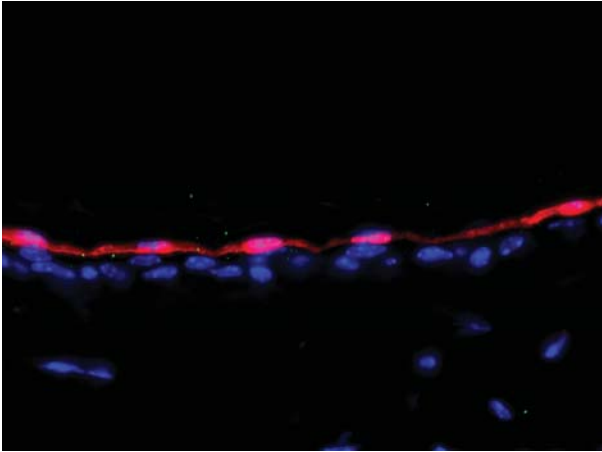

Trop2

K14

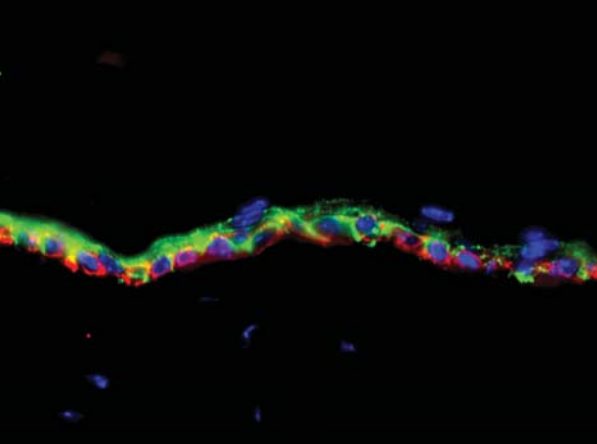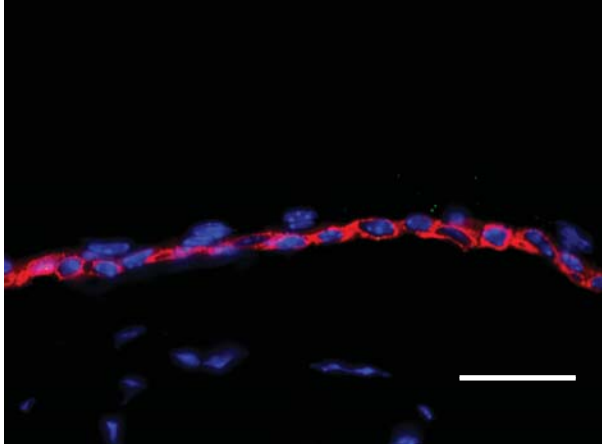

Supplementary Figure 3. Wang, J. et al.

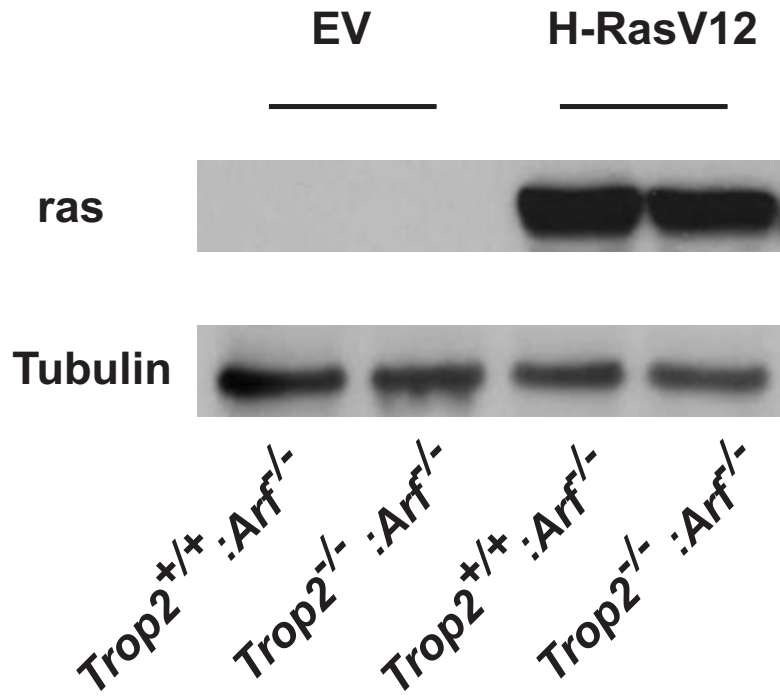

Supplementary Figure 4. Wang, J. et al.

*Trop2<sup>-/-</sup>:Arf<sup>-/-</sup>*

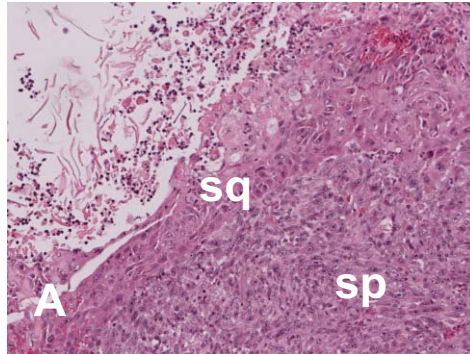

E-cadherin

Vimentin

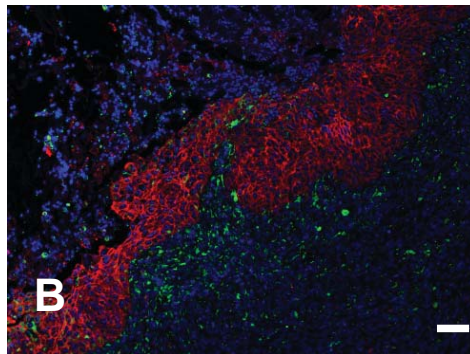

## Supplementary Table 1. Wang, J. et al.

| A                           | <u>Papillomas/Mouse</u>     |          |
|-----------------------------|-----------------------------|----------|
|                             | <i>Trop2</i> <sup>+/+</sup> | 2 (n=10) |
| <i>Trop2</i> <sup>-/-</sup> | 2.25 (n=12)                 |          |

  

| B                                                       | <u>Papillomas/Mouse</u>                                 |            |
|---------------------------------------------------------|---------------------------------------------------------|------------|
|                                                         | <i>Trop2</i> <sup>+/+</sup> : <i>Arf</i> <sup>-/-</sup> | 4.8 (n=24) |
| <i>Trop2</i> <sup>-/-</sup> : <i>Arf</i> <sup>-/-</sup> | 5.2 (n=24)                                              |            |
